# Supplementary material
Source: Springer Nature journal article supplement (https://www.springermedizin.de/resource/supplementary/13033_2011_115_MOESM1_ESM.pdf/9651854)

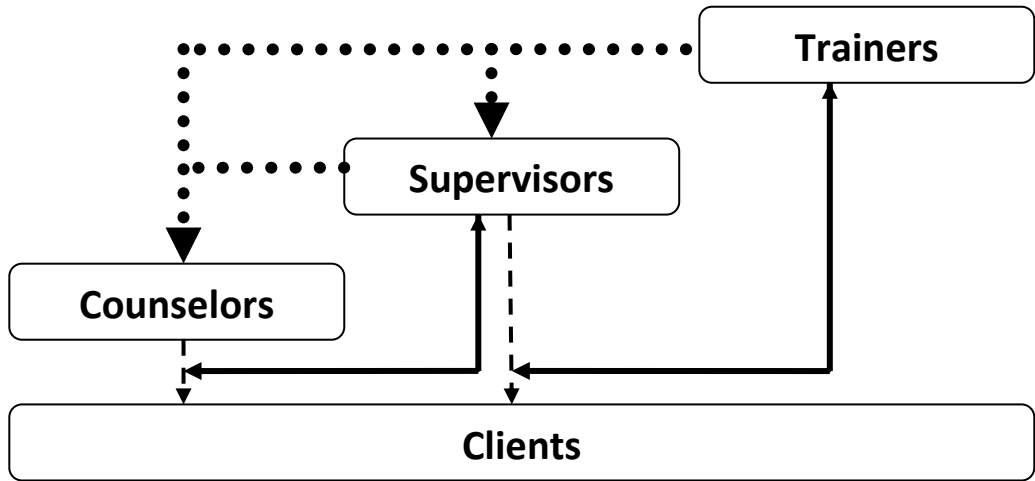

● ● ● ● ● Training and coaching

———— Quality Control

- - - - Service provision

Supplement: MOESM1 [file 9651854]
